# Supplementary material
Source: bioRxiv or medRxiv preprint supplement (https://www.biorxiv.org/highwire/filestream/115769/field_highwire_adjunct_files/6/381525-7.pdf)
Supplement: Supplementary file [file 381525-7.pdf]

## SUPPLEMENTAL TABLE 4: XBP1s protein vs ALLC interactions

| Gene     | Log2 FC<br>XBP1s<br>Protein<br>Levels | Log2 FC<br>XBP1s<br>ALLC<br>Interactions |
|----------|---------------------------------------|------------------------------------------|
| STT3A    | 0.79388878                            | -0.3540251                               |
| RPN1     | 0.53546268                            | -0.2557404                               |
| LMAN1    | 0.53634054                            | -0.1500256                               |
| DNAJC10  | 0.69729195                            | -0.3353704                               |
| MANF     | 0.97420245                            | 0.1806661                                |
| ERP44    | 0.47109056                            | -0.0755108                               |
| CALR     | 0.58149608                            | -0.5507767                               |
| P4HB     | 0.91020824                            | -0.3313883                               |
| HSPA5    | 0.73316788                            | -0.3574739                               |
| PDIA4    | 1.0472745                             | -0.0365827                               |
| DNAJB11  | 0.58202142                            | -0.2513346                               |
| HYOU1    | 1.00490426                            | -0.099746                                |
| PDIA6    | 0.91030008                            | -0.448138                                |
| CCT6A    | -0.0759066                            | 0.13453362                               |
| MOGS     | 0.40341452                            | -0.4682301                               |
| ERLIN2   | 0.03342887                            | -0.6480722                               |
| UGGT1    | 0.5290639                             | -0.3036941                               |
| DNAJC3   | 0.74390076                            | -0.1591624                               |
| LGALS3BP | 0.10627567                            | -0.370781                                |
| GOLM1    | 0.1864777                             | -0.1012267                               |
| CPD      | 0.03418929                            | -0.1526823                               |
| TUBA1A   | 0.17233916                            | -0.0034825                               |
| PRDX4    | 0.32914856                            | -0.6194405                               |
| SRP72    | 0.42451925                            | -0.5267014                               |
| RCN2     | -0.1032212                            | -0.4269714                               |
| SRP9     | -0.1270257                            |                                          |
| CKAP4    | 0.56139581                            | -0.2780408                               |
| HSP90B1  | 0.4916602                             | -0.3204746                               |
| SERPINH1 | -0.1355517                            | -0.6076146                               |
| HSPA1L   | 0.05634514                            | 0.05397436                               |
| GLG1     | 0.21110975                            | 0.20509936                               |
| AHCY     | -0.0002096                            | 0.14215011                               |
| GANAB    | 0.2064322                             | -0.7421617                               |
| THUMP1   | 0.2450655                             |                                          |
| ERP29    | 0.16777313                            | -0.794315                                |
| DDOST    | 0.57211043                            | -0.576607                                |
| DYNC1H1  | 0.06471028                            | -0.0889812                               |
| PDIA3    | 0.74231131                            | -0.2999339                               |
| PDCD5    | -0.028606                             | -0.2027578                               |
| P4HA1    | 0.07787408                            | -0.6426684                               |
| RPN2     | 0.72808296                            | -0.5097915                               |
| CNPY2    | 0.14044886                            | -0.5100783                               |
| FKBP10   | 0.33524812                            | -0.5658795                               |
| CALU     | 0.45862453                            | -0.1668984                               |
| TFRC     | 0.02685545                            | -0.051532                                |
| PPIB     | 0.95033476                            | -0.4354717                               |
| TMX1     | 0.21847885                            | -0.4636175                               |
| ERLIN1   | 0.10830743                            | -0.4983346                               |
| MAN2A1   | 0.36970115                            | -0.0147253                               |
| SRSF1    | 0.0675904                             | 0.07239384                               |
| TLN1     | 0.16550721                            | -0.0415854                               |
| TXNDC5   | 0.66489419                            | -0.1192495                               |
| RCN1     | 0.18207249                            | -0.3636221                               |
| PRKCSH   | 0.03367702                            | -0.5337789                               |
| HSPA2    | -0.0024239                            | -0.0321035                               |
| NCLN     | 0.21704261                            | -0.5454812                               |
| CANX     | 0.65812662                            | -0.3061379                               |
| PLOD3    | 0.13785453                            | -0.5299699                               |
| ACLY     | 0.0990159                             | 0.09882126                               |
| RPL34    | 0.08753471                            | -0.2703092                               |
| PLOD1    | 0.05677977                            |                                          |
